# Supplementary material for: FBF1 deficiency promotes beiging and healthy expansion of white adipose tissue
Source: PubMed Central journal article supplement — Cell Rep. Author manuscript; Available in PMC 2021 Sep 9. (PMC8428195; doi:10.1016/j.celrep.2021.109481), 2021-08-03
Supplement: NIHMS1730379-supplement-1.pdf [file NIHMS1730379-supplement-1.pdf]

**Supplemental information**

**FBF1 deficiency promotes beiging and  
healthy expansion of white adipose tissue**

**Yingyi Zhang, Jielu Hao, Mariana G. Tarrago, Gina M. Warner, Nino Giorgadze, Qing Wei, Yan Huang, Kai He, Chuan Chen, Thais R. Peclat, Thomas A. White, Kun Ling, Tamar Tchkonina, James L. Kirkland, Eduardo N. Chini, and Jinghua Hu**

Supplementary Figures

Figure S1

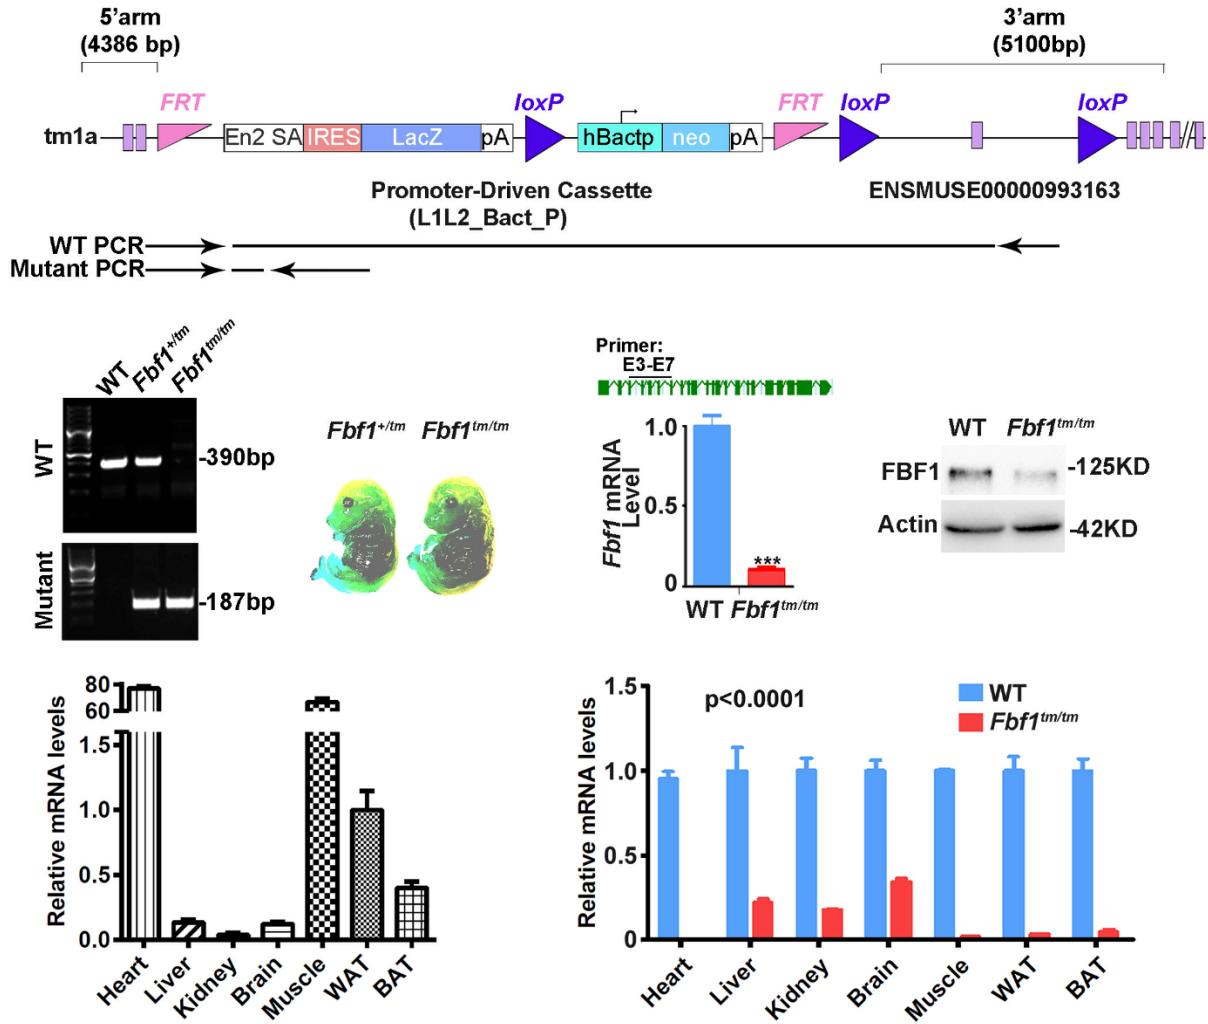

Figure S1. Generating *Fbf1<sup>tm/tm</sup>* homozygous mice and phenotyping. Related to Figure 1.

(A) Schematic of the 'knockout-first' conditional allele. The 'knockout-first' allele (*tm1a*) contains IRES: lacZ trapping cassette and a floxed promoter-driven neo cassette inserted into the intron of a gene, disrupting gene function.

(B) PCR genotyping results.

(C) LacZ reporter gene whole-mount analysis by X-gal staining of E15 embryos.

(D) Relative mRNA expression level of *Fbf1* in E13.5 embryos of *Fbf1<sup>tm/tm</sup>* and WT littermates. Values are expressed as mean  $\pm$  SEM. n = 8, \*\*\*p < 0.001.

(E) Protein expression level of FBF1 in E13.5 embryos of *Fbf1<sup>tm/tm</sup>* and WT littermates.

(F) Relative mRNA expression level of *Fbf1* in WT adult tissues/organs.

(G) Relative mRNA expression level of *Fbf1* in adult tissues/organs of *Fbf1<sup>tm/tm</sup>* and WT littermates.

Figure S2

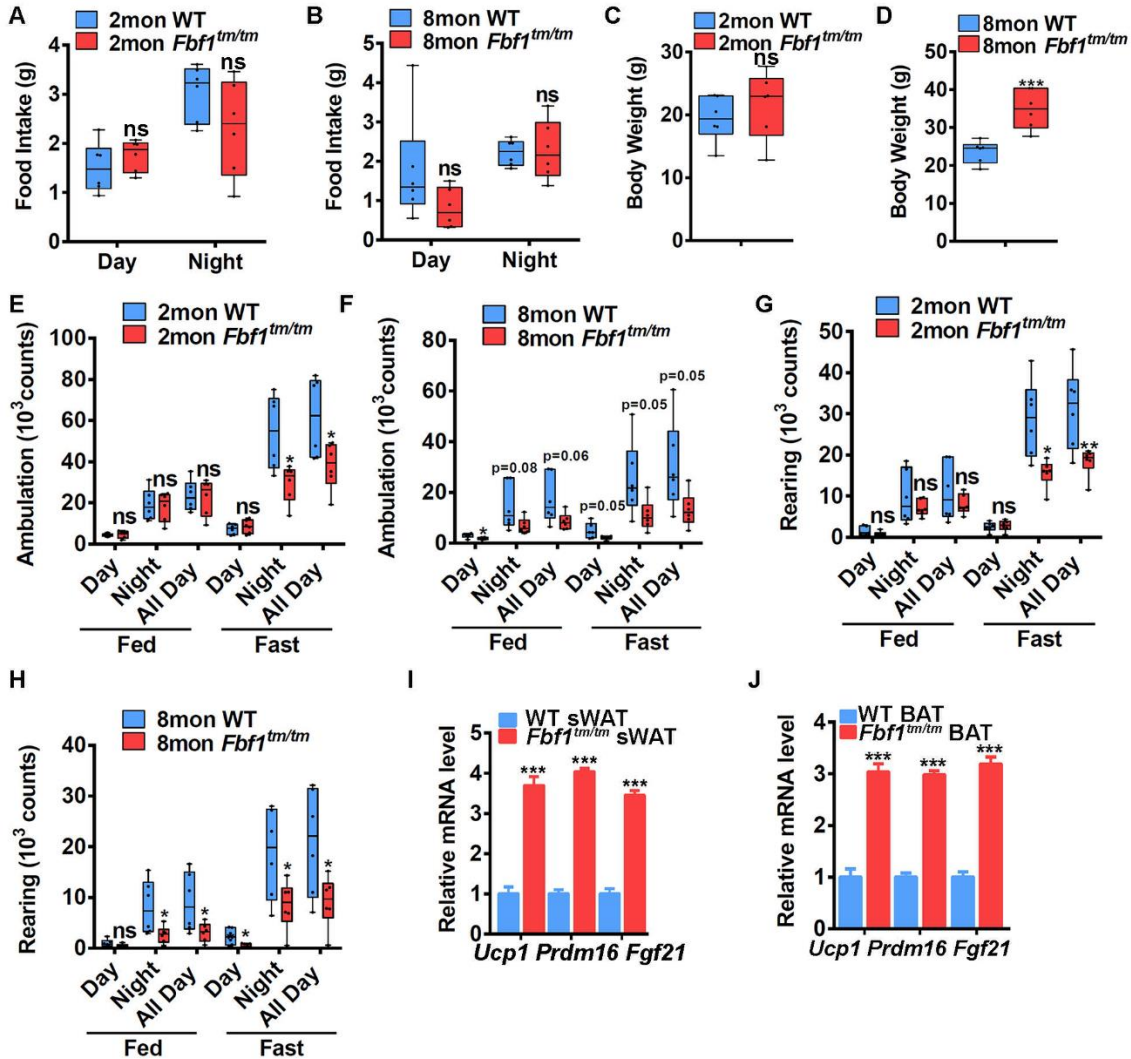

Figure S2. Comprehensive Laboratory Animal Monitoring System (CLAMS) data and relative mRNA levels of beige genes in adipose tissues. Related to Figure 2.

(A-H) Multiple metabolic parameters were monitored in *Fbf1<sup>tm/tm</sup>*/WT littermates at 2 months and 8 months (n=6 in each group). (A and B) Food intake, (C and D) body weight, (E and F) ambulation and (G and H) rearing in 2-mon (A, C, E and G) and 8-mon mice (B, D, F and H).

(I) Relative mRNA levels of beige program genes in sWAT of *Fbf1<sup>tm/tm</sup>* and WT control.

(J) Relative mRNA levels of beige program genes in BAT of *Fbf1<sup>tm/tm</sup>* and WT control. Values are expressed as mean  $\pm$  SEM, P-values were indicated in figures as follows: \*p < 0.05, \*\*p < 0.01 and \*\*\*p < 0.001.

Figure S3

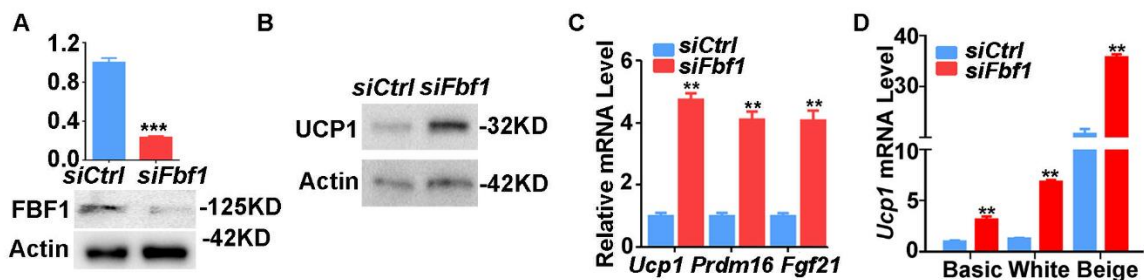

**Figure S3. FBF1 Depletion Induces the Beiging of WAT. Related to Figure 3.**

(A) Relative mRNA and protein levels of FBF1 in 3T3-L1 cells treated with siRNAs.

(B) Immunodetection of UCP1 in control or *Fbf1*-knockdown 3T3-L1 cells with corresponding  $\beta$ -actin immunodetection as loading control.

(C) Relative mRNA levels of beiging program genes at day 4 of adipogenic differentiation of 3T3-L1 cells treated with control or *Fbf1* siRNA.

(D) Relative mRNA level of *Ucp1* in control or *Fbf1*-knockdown 3T3-L1 cells upon induced differentiation to beige adipocytes at day 8. Values are expressed as mean  $\pm$  SEM, \*\* $p < 0.01$ .

Figure S4

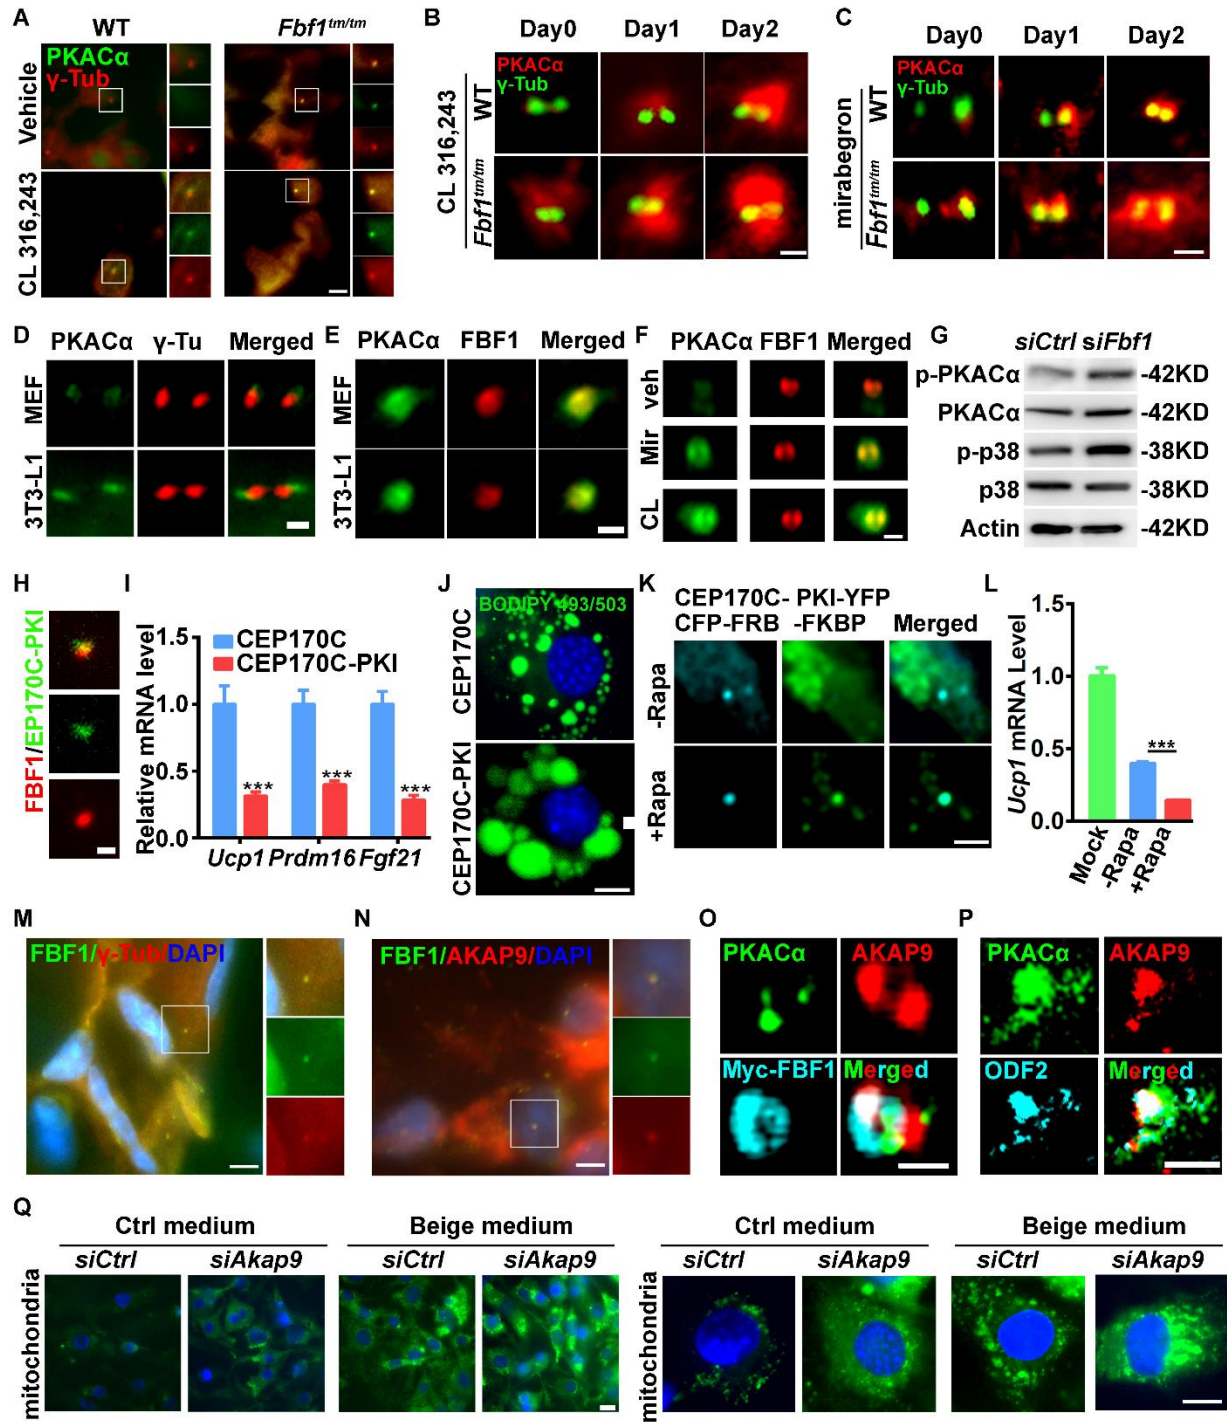

**Figure S4. FBF1 Regulates Adipose Beiging through a cilia-specific PKA signaling. Related to Figure 4.**

- (A) The localization of PKAC $\alpha$  (Green) in vWAT from 6-mon female WT mice or *Fbfl<sup>tm/tm</sup>* littermates. Centrosomes were stained with anti- $\gamma$ -tubulin (Red). Scale bar, 5  $\mu$ m.
- (B and C) PKAC $\alpha$  localization in WT and *Fbfl<sup>tm/tm</sup>* vWAT preadipocytes before and after treated with (B) CL316, 243 or (C) mirabegron. Centrosomes were stained with  $\gamma$ -tubulin. Scale bar, 1  $\mu$ m.
- (D) The localization of PKAC $\alpha$  (Green) in 3T3-L1 cells and WT MEFs. Centrosomes were stained with anti- $\gamma$ -tubulin (Red). Scale bar, 1  $\mu$ m
- (E) The localization of PKAC $\alpha$  (Green) in 3T3-L1 cells and WT MEFs. FBF1 labels TFs (Red). Scale bar, 1  $\mu$ m.
- (F) The localization of PKAC $\alpha$  (Green) in 3T3-L1 cells induced with  $\beta$ 3-adrenergic agonists CL 316,243 or mirabegron. FBF1 labels basal bodies (Red). Scale bar, 1  $\mu$ m.
- (G) Immunoblotting in 3T3-L1 cells at day 2 after induced with  $\beta$ 3-adrenergic agonists CL 316,243.
- (H) 3T3-L1 cells labelled with GFP-tagged CEP170C-PKI. FBF1 labeled TFs. Scale bar, 1  $\mu$ m.
- (I) Relative mRNA levels of beiging genes in 3T3-L1 cells overexpressed CEP170C or CEP170C-PKI.
- (J) 3T3-L1 cells overexpressed CEP170C or CEP170C-PKI were treated with CL 316, 243 and differentiated for 7 days, then fixed, stained and imaged. Green: lipids, Blue: nuclei. Scale bar, 50  $\mu$ m.
- (K) Transient treatment of 100 nM rapamycin for 6 hours induces strong recruitment of YFP-FKBP-PKI to the CFP-FRB-CEP170C at the ciliary base in WAT preadipocytes.
- (L) Relative mRNA levels of *Ucp1* in WAT preadipocytes cells overexpressed YFP-FKBP-PKI and CFP-FRB-CEP170C with or without rapamycin treatment.
- (M) The localization of FBF1 (Green) in vWAT from 6-mon female WT mice or *Fbfl<sup>tm/tm</sup>* littermates. Centrosomes were stained with anti- $\gamma$ -tubulin (Red). Scale bar, 5  $\mu$ m.
- (N) The localization of AKAP9 (Red) in vWAT from 6-mon female WT mice or *Fbfl<sup>tm/tm</sup>* littermates. TFs were stained with FBF1 (Green). Scale bar, 5  $\mu$ m.
- (O) SIM image of the basal body of vWAT preadipocytes stained for PKAC $\alpha$ , AKAP9, and FBF1. Scale bar, 1  $\mu$ m
- (P) SIM image of the basal body of *siFbfl*-treated 3T3-L1 cells stained for PKAC $\alpha$ , AKAP9, and ODF2. Scale bar, 1  $\mu$ m
- (Q) Control or *Akap9*-knockdown 3T3-L1 cells induced with control or beige medium. At day 7, cells were labeled with Mitochondria-GFP. At day 8, cells were fixed, stained and imaged. Green: mitochondria, Blue: nuclei. Scale bar, 50  $\mu$ m.

Figure S5

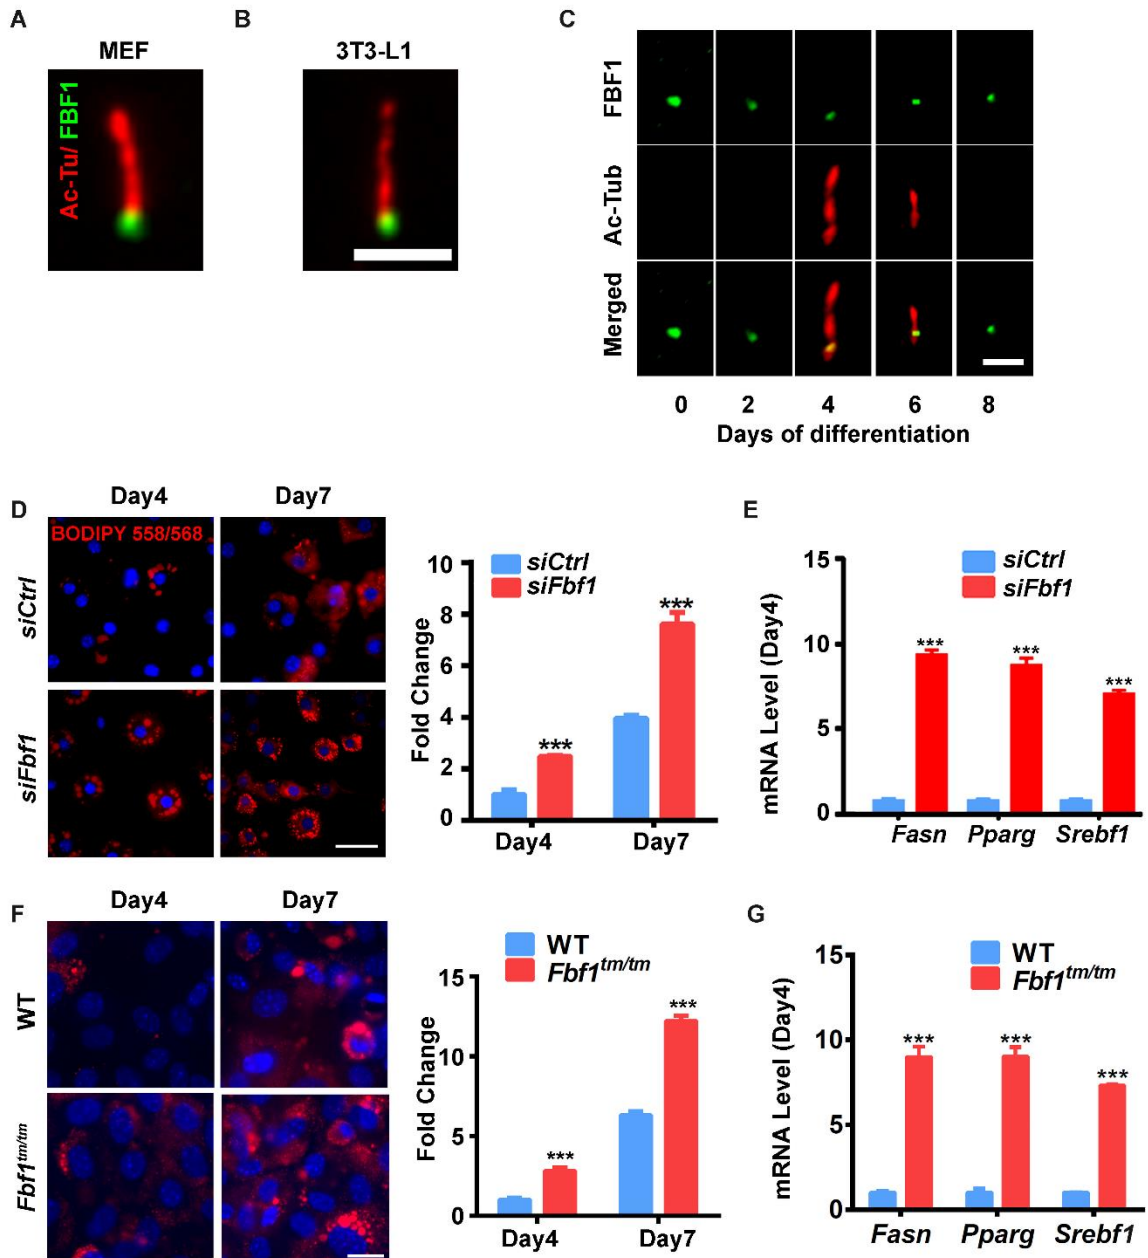

**Figure S5. FBF1 Deficiency Enhances Adipogenic Program. Related to Figure 5.**

(A and B) Primary cilia (red) present in WT MEFs (A) and 3T3-L1(B) cells after serum starvation. Scale bar, 5  $\mu$ m. (C) Immunofluorescence images of cilia (Ac-tubulin, Red) and (FBF1) staining during adipogenic differentiation of 3T3-L1 cells. Scale bar, 5  $\mu$ m. (D) 3T3-L1 cells were treated with siRNAs and then induced with adipogenic medium. At day 4/7, cells were fixed, stained and imaged by fluorescence microscopy. Red: lipids, Blue: nuclei. Scale bar, 60  $\mu$ m.

(E) Relative mRNA levels of adipogenic regulatory genes at day 4 of differentiation of 3T3-L1 cells treated with siRNAs. Values are expressed as mean  $\pm$  SEM, \*\*\*p < 0.001.

(F) vWAT preadipocytes were treated with siRNAs and then induced with adipogenic medium. At day 4/7, cells were fixed, stained, and imaged by fluorescence microscopy. Red: lipids, Blue: nuclei. Scale bar, 25  $\mu$ m.

(G) Relative mRNA levels of adipogenic regulatory genes at day 4 of differentiation of vWAT preadipocytes cells treated with siRNAs. Values are expressed as mean  $\pm$  SEM, \*\*\*p < 0.001.



Figure S6

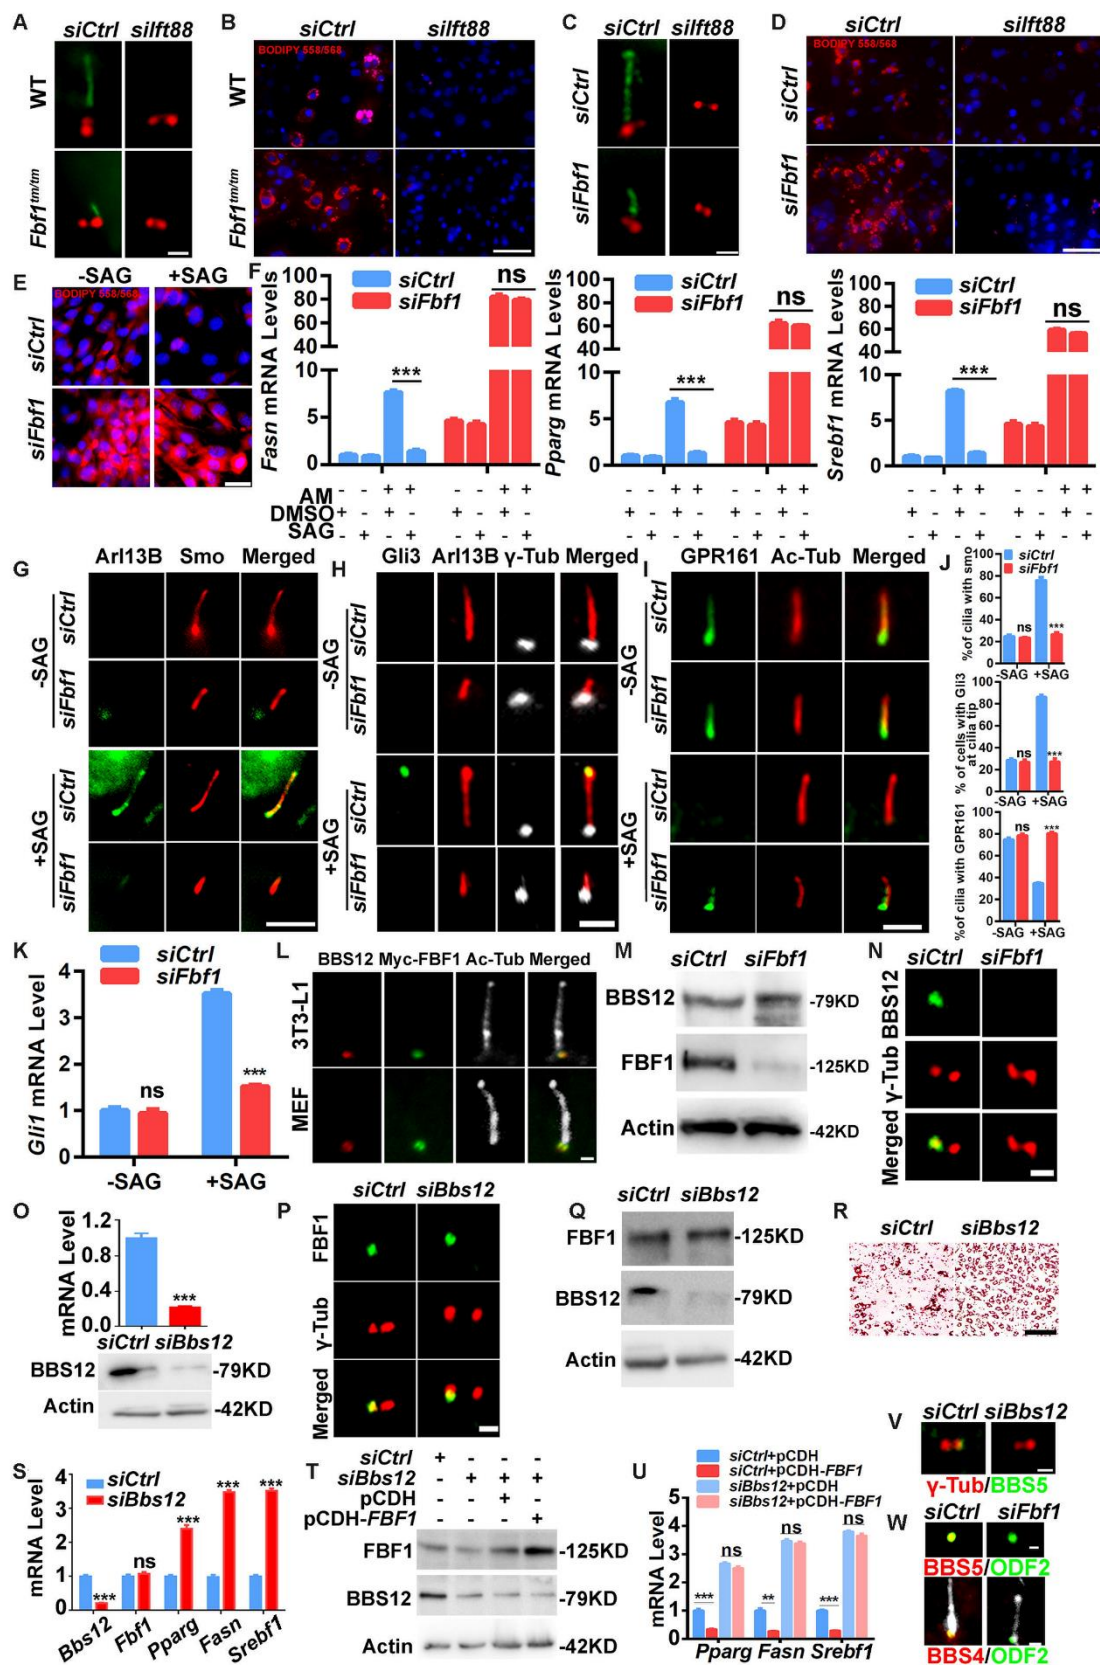

**Figure S6. FBF1 Controls Hh Signaling by Recruiting BBS Chaperonin and BBSome to TFs. Related to Figure 6.**

- (A and C) Primary cilia were stained with Arl13B (Green) and the centrosomes/basal bodies were stained with  $\gamma$ -tubulin (Red) in (A) WT/*Fbfl*<sup>tm/tm</sup> MEFs or (C) control/*Fbfl*-knockdown 3T3-L1 cells treated with control or *Ift88* siRNA. Scale bar, 2  $\mu$ m.
- (B) WT/*Fbfl*<sup>tm/tm</sup> MEFs and (D) control/*Fbfl*-knockdown 3T3-L1 cells were treated with control/ or *Ift88* siRNAs and differentiated for 7 days, then stained with BIDIPY. Red: lipids, Blue: nuclei. Scale bar, 150  $\mu$ m.
- (E) Control or *Fbfl*-knockdown 3T3-L1 cells were treated with DMSO or SAG and differentiated. At day 7, cells were fixed, stained, and imaged. Red: lipids, Blue: nuclei. Scale bar, 150  $\mu$ m.
- (F) Relative mRNA level of adipogenic regulatory genes at day 4 of adipogenic differentiation in control or *Fbfl*-knockdown 3T3-L1 cells that were treated with DMSO or SAG.
- (G-I) The localization of (G) SMO, (H) Gli3 and (I) GPR161 in primary cilia of control or *Fbfl*-knockdown 3T3-L1 cells treated with DMSO or SAG. Basal bodies and cilia were labeled with anti- $\gamma$ -tubulin and anti-acetylated tubulin. Scale bar, 5  $\mu$ m.
- (J) Statistical analysis of SMO-positive cilia, Gli3-positive cilia tip and GPR161-positive cilia. Data were calculated from 300 cilia in each group. Values are expressed as mean  $\pm$  SEM, \*\*\*p < 0.001.
- (K) *Gli1* mRNA levels in control or *Fbfl*-knockdown 3T3-L1 cells before and after Hh activation. (L) BBS12 Localization in WT MEFs or 3T3-L1 cells. Ac-tubulin labeled primary cilia. FBF1 labeled Basal bodies. Scale bar, 1  $\mu$ m.
- (M) Cell lysates from 3T3-L1 cells treated with control or *Fbfl* siRNAs were immunoblotted.
- (N) The localization of BBS12 (Green) in control or *Fbfl*-knockdown 3T3-L1 cells. Centrosomes were stained with anti- $\gamma$ -tubulin (Red). Scale bar, 1  $\mu$ m.
- (O) Relative mRNA and protein levels of BBS12 in 3T3-L1 cells treated with control or *Bbs12* siRNA.
- (P) The localization of FBF1 (Green) in control or BBS12-knockdown 3T3-L1 cells. Centrosomes were stained with anti- $\gamma$ -tubulin (Red). Scale bar, 1  $\mu$ m.
- (Q) Protein level of FBF1 in 3T3-L1 cells treated with control or *Bbs12* siRNA.
- (R) Control or *Bbs12*-knockdown 3T3-L1 cells were induced to differentiate 14 days, and cells were then stained with Oil Red O. Scale bar, 150  $\mu$ m.
- (S) Relative mRNA levels of adipogenic regulatory genes at day 4 of adipogenic differentiation in control or *Bbs12*-knockdown 3T3-L1 cells.
- (T) Immunodetection of BBS12 and FBF1 in control or *Bbs12*-knockdown 3T3-L1 cells overexpressed with vehicle or FBF1.
- (U) Relative mRNA levels of adipogenic regulatory genes at day 4 of adipogenic differentiation in *Bbs12*-knockdown 3T3-L1 cells overexpressed with vehicle or FBF1.
- (V) BBS5 localization in control or *BBS12*-knockdown 3T3-L1 cells. Centrosomes were stained with anti- $\gamma$ -tubulin. Scale bar, 1  $\mu$ m.
- (W) BBS4/5 localization in control or *Fbfl*-knockdown 3T3-L1 cells. Primary cilia were stained with anti-Ac-tubulin. ODF2 labels basal bodies. Scale bar, 1  $\mu$ m. Values are expressed as mean  $\pm$  SEM, n=3 in each group. P-values were indicated in figures as follows: \*\*p < 0.01 and \*\*\*p < 0.001.

Figure S7

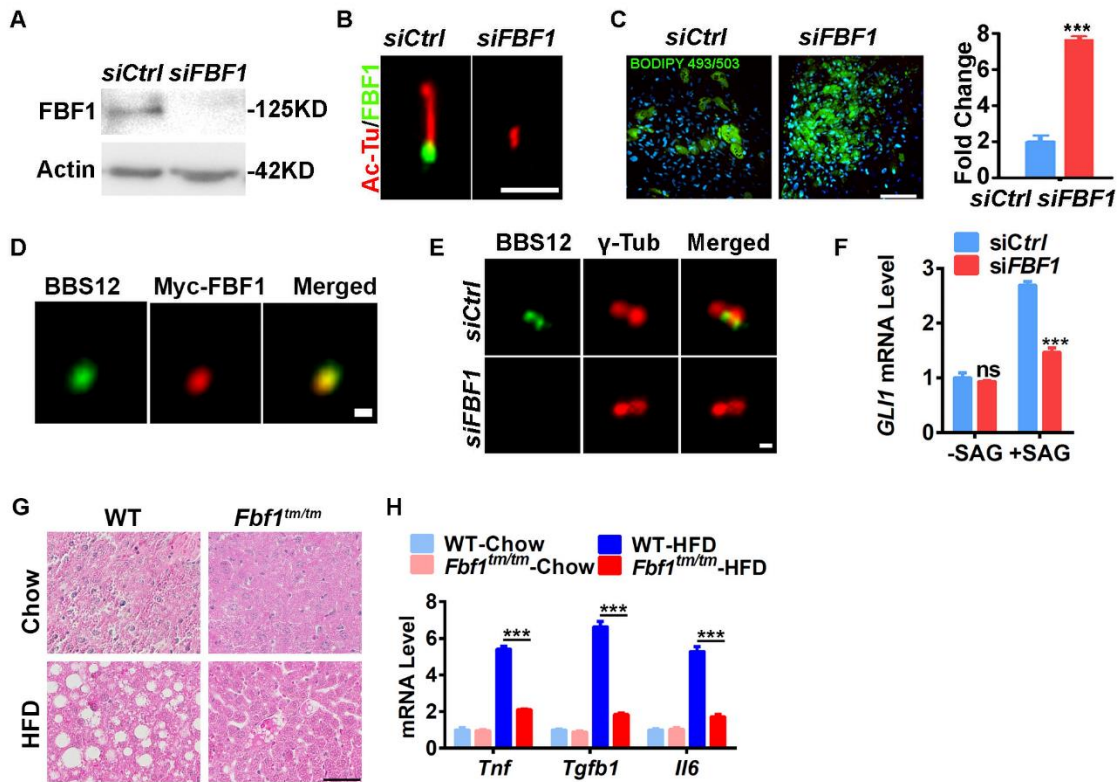

**Figure S7. FBF1 Depletion Promotes Adipogenic Program during Human Preadipocyte differentiation and Protects animal organs. Related to Figure 7.**

(A) Immunodetection of FBF1 in human adipocyte progenitors treated with control or *FBF1* siRNA.

(B) The localization of FBF1 (Green) in human adipocyte progenitors treated with control or *FBF1* siRNA. Cilia were stained with anti-Ac-tubulin (Red). Scale bar, 5  $\mu$ m.

(C) Human adipocyte progenitors treated with control or *FBF1* siRNA were induced to differentiate for 14 days, and cells were then fixed, stained, and imaged. Green: lipids, Blue: nuclei. Scale bar, 200  $\mu$ m. Images are representative of n=6 replicates.

(D) The localization BBS12 (Green) in human adipocyte progenitors. FBF1 labeled basal bodies (Red). Scale bar, 1  $\mu$ m.

(E) BBS12 localization in human adipocyte progenitors treated with control or *FBF1* siRNA. Centrosomes were stained with  $\gamma$ -tubulin. Scale bar, 5  $\mu$ m.

(F) *GLI1* mRNA level in human adipocyte progenitors treated with control or *FBF1* siRNA before and after Hh activation. P-values were indicated in figures as follows: \*\*\*p < 0.001.

(G) H&E staining of the liver sections of 5-mon-old *Fbf1<sup>tm/tm</sup>* mice and WT littermates treated with HFD for 3 months. n=6 in each group. Scale bar, 50  $\mu$ m.

(H) Relative mRNA levels of inflammation genes in the liver of 5-mon-old *Fbf1<sup>tm/tm</sup>* mice and WT littermates treated with HFD for 3 months. n=6 in each group.

**Table S1 Specific primer pairs used in this study. Related to STAR Methods.**

| Oligo Type                                                                     | Oligo name                                                                  | Oligo sequence (5' to 3')  |                      |
|--------------------------------------------------------------------------------|-----------------------------------------------------------------------------|----------------------------|----------------------|
| Specific primer pairs used in <i>Fbfl</i> <sup>tm1a/tm1a</sup> mice genotyping | CAS_R1_Term                                                                 | TCGTGGTATCGTTATGCGCC       |                      |
|                                                                                | Fbfl_33719_F                                                                | GGCCTATATCTTGAGCCTCTGA     |                      |
|                                                                                | Fbfl_33719_R                                                                | CAAAAGCCTCCCAGACAGAC       |                      |
|                                                                                | LacZ_2_small_F                                                              | ATCACGACGCGCTGTATC         |                      |
|                                                                                | LacZ_2_small_R                                                              | ACATCGGGCAAATAATATCG       |                      |
| Specific primer pairs used in quantitative Real-time PCR experiments (Mouse)   | <i>Fbfl</i> _F                                                              | ATGACTGGACAGTGCTGTGAGG     |                      |
|                                                                                | <i>Fbfl</i> _R                                                              | CTCAGCATCAGCTCCTGCCAG      |                      |
|                                                                                | <i>Akap9</i> _F                                                             | CCATGAACAACAGACAGATGG      |                      |
|                                                                                | <i>Akap9</i> _R                                                             | GCTATTTCTTCTTCCAGTCG       |                      |
|                                                                                | <i>Fasn</i> _F                                                              | AGCGGCCATTTCCATTGCC        |                      |
|                                                                                | <i>Fasn</i> _R                                                              | CCATGCCCAGAGGGTGGTTG       |                      |
|                                                                                | <i>Srebfl</i> _F                                                            | GAACAGACACTGGCCGAGAT       |                      |
|                                                                                | <i>Srebfl</i> _R                                                            | GAGGCCAGAGAAGCAGAAGAG      |                      |
|                                                                                | <i>Pparg</i> _F                                                             | AAGATTTGAAAGAAGCGGTGAAC    |                      |
|                                                                                | <i>Pparg</i> _R                                                             | CAATGGCCATGAGGGAGTTAG      |                      |
|                                                                                | <i>Gli1</i> _F                                                              | ATGAAGCTAGGGGTCCAGGT       |                      |
|                                                                                | <i>Gli1</i> _R                                                              | AGAAGGGAACCTACCCCAGT       |                      |
|                                                                                | <i>Ucp1</i> _F                                                              | GTGAACCCGACAACCTCCGAA      |                      |
|                                                                                | <i>Ucp1</i> _R                                                              | TGAAACTCCGCTGAGAAGAT       |                      |
|                                                                                | <i>Prdm16</i> _F                                                            | CCACCAGCGAGGACTTCAC        |                      |
|                                                                                | <i>Prdm16</i> _R                                                            | GGAGGACTCTCGTAGCTCGAA      |                      |
|                                                                                | <i>Fgf21</i> _F                                                             | GGGATGGGTCAGGTTTCTCAGC     |                      |
|                                                                                | <i>Fgf21</i> _R                                                             | TTCCTCTTGGATGGCCTCAT       |                      |
|                                                                                | <i>Bbs12</i> _F                                                             | GCCAGGGACTTCAGCACAGT       |                      |
|                                                                                | <i>Bbs12</i> _R                                                             | GCCTCTTCTCATTCTGCTTG       |                      |
|                                                                                | <i>Tnf</i> _F                                                               | CTGATGAGAGGGAGGCCATT       |                      |
|                                                                                | <i>Mcp1</i> _F                                                              | CCACTCACCTGCTGCTACTCAT     |                      |
|                                                                                | <i>Mcp1</i> _R                                                              | TGGTGATCCTCTTGTAGCTCTCC    |                      |
|                                                                                | <i>Tgfb1</i> _F                                                             | TACCATGCC AACTTCTGTCTGGG A |                      |
|                                                                                | <i>Tgfb1</i> _R                                                             | ATGTTGGACAAC TGCTCCACCTTG  |                      |
|                                                                                | <i>Il6</i> _F                                                               | CTGCAAGAGACTTCCATCCAG      |                      |
|                                                                                | <i>Il6</i> _R                                                               | AGTGGTATAGACAGGTCTGTTGG    |                      |
|                                                                                | <i>Actin</i> _F                                                             | GTGGGCCGCCCTAGGCACCAG      |                      |
|                                                                                | <i>Actin</i> _R                                                             | TTGGCCTTAGGGTTCAGGGGGG     |                      |
|                                                                                | Specific primer pairs used in quantitative Real-time PCR experiment (Human) | <i>UCP1</i> _F             | TCTCTCAGGATCGGCCTCTA |
|                                                                                |                                                                             | <i>UCP1</i> _R             | GTGGGTTGCCCAATGAATAC |
|                                                                                |                                                                             | <i>FGF21</i> _F            | ACCTGGAGATCAGGGAGGAT |
|                                                                                |                                                                             | <i>FGF21</i> _R            | GCACAGGAACCTGGATGTCT |
| <i>PRDM16</i> _F                                                               |                                                                             | AAATACTGACGGACGTGGAAGT     |                      |
| <i>PRDM16</i> _R                                                               |                                                                             | GACACTGGTCGCATTTGTACTC     |                      |
| <i>COX1</i> _F                                                                 |                                                                             | AAGGAGATGGCAGCAGAGTT       |                      |
| <i>COX1</i> _R                                                                 |                                                                             | GTGGCCGTCTTGACAATGTT       |                      |
| <i>HK2</i> _F                                                                  |                                                                             | CAAAGTGACAGTGGGTGTGG       |                      |
| <i>HK2</i> _R                                                                  |                                                                             | GCCAGGTCTTCACTGTCTC        |                      |
| <i>COX7A</i> _F                                                                | TGACATCCCCTTGTACCTGAA                                                       |                            |                      |

|  |                 |                         |
|--|-----------------|-------------------------|
|  | <i>COX7A_R</i>  | AAGGAGGCCCAAG           |
|  | <i>SREBF1_F</i> | TCAGCGAGGCGGCTTTGGAGCAG |
|  | <i>SREBF1_R</i> | CATGTCTTCGATGTCGGTCAG   |
|  | <i>FASN_F</i>   | CTTCCGAGATTCCATCCTACGC  |
|  | <i>FASN_R</i>   | TGGCAGTCAGGCTCACAAACG   |
|  | <i>PPARG_F</i>  | CGGTTTCAGAAGTGCCTTG     |
|  | <i>PPARG_R</i>  | GGTTCAGCTGGTCGATATCAC   |
|  | <i>GLII_F</i>   | TAAAGCTCCAGTGAACACA     |
|  | <i>GLII_R</i>   | TCCCACTTTGAGAGGCCCAT    |
|  | <i>Actin_F</i>  | AGCTACGAGCTGCCTGACGG    |
|  | <i>Actin_R</i>  | CCAGACAGCACTGTGTTGG     |

**Table S2 Sequences of siRNA. Related to STAR Methods.**

| Oligo name         | Oligo sequence (5' to 3') |
|--------------------|---------------------------|
| <i>Fbf1</i> siRNA  | TGAACAGTTCTTCCTGGAG       |
|                    | CAGCTCAGCATGCGTCATATT     |
|                    | ACAAGCCTGCTGGCACATTAAC    |
| <i>Ift88</i> siRNA | (Deren et al., 2016)      |
| <i>Bbs12</i> siRNA | CCTGGGATTTAATAAGTCTGTAAAT |
|                    | CCTTTCCGAGTGATTCTCATT     |
| <i>Akap9</i> siRNA | GAATATTGATGGAATTATT       |
|                    | GCAGCAGCACATGAAGACAAA     |
| <i>FBF1</i> siRNA  | (Wei et al., 2013)        |
